# Supplementary material
Source: Royal Society of Chemistry journal article supplement (doi:10.1039/d5tc04440e)
Supplement: d5tc04440e1.pdf [file d5tc04440e1.pdf]

## Supplementary Information

### Realization of high-temperature metallic altermagnetism in transition metal graphite intercalation compounds

Xiaojun He,<sup>a†</sup> Guo-Dong Zhao,<sup>b†</sup> Weida Fu,<sup>a</sup> Tao Hu,<sup>\*a</sup> Wencai Yi,<sup>d</sup> Hui Zhang,<sup>b</sup> Xiaonong Shen,<sup>b</sup>  
Alessandro Stroppa,<sup>c</sup> Wei Ren<sup>b</sup> and Zhongming Ren<sup>a</sup>

<sup>a</sup>School of Materials Science and Engineering, State Key laboratory of Advanced Special Steel,  
Shanghai University, Shanghai, 200241, China

<sup>b</sup>Department of Physics, Materials Genome Institute, International Centre for Quantum and  
Molecular Structures, Shanghai University, Shanghai 200444, China

<sup>c</sup>CNR-SPIN c/o Università degli Studi dell'Aquila, Via Vetoio 10, I-67010 Coppito (L'Aquila), Italy

<sup>d</sup>Laboratory of High Pressure Physics and Material Science, School of Physics and Physical  
Engineering, Qufu Normal University, Qufu 273165, China

\* Corresponding author: [taohu@shu.edu.cn](mailto:taohu@shu.edu.cn) (T. Hu)

Table S1

The table lists the magnetic ground states for transition metals (TMs) at various intercalation sites (HH, NH, and TS).  $\Delta E$  denotes the energy difference between the AFM and FM states in meV.

| TM | U <sub>eff</sub> (eV) |                       | Intercalation site |     |     |
|----|-----------------------|-----------------------|--------------------|-----|-----|
|    |                       |                       | HH                 | NH  | TS  |
| Cr | 3.4                   | Magnetic ground state | FM                 | AFM | AFM |
|    |                       | $\Delta E$ (meV)      | 378                | 345 | 14  |
| Mn | 4.8                   | Magnetic ground state | FM                 | FM  | FM  |
|    |                       | $\Delta E$ (meV)      | 66                 | 246 | 90  |
| Fe | 5.1                   | Magnetic ground state | FM                 | FM  | AFM |
|    |                       | $\Delta E$ (meV)      | 100                | 980 | 114 |
| Co | 6.2                   | Magnetic ground state | FM                 | NM  | AFM |
|    |                       | $\Delta E$ (meV)      | 21                 | \   | 50  |

Table S2

Calculated properties of V-GICs under different intercalation concentrations and atomic distributions. This table summarizes the evolution of magnetic ground states, symmetry, and electronic properties across various concentrations (50%, 25%, 12.5%, 6.25%, and 5.56%).

| Concentration | Magnetic ground state | Space group | Magnetic moment ( $\mu_B$ ) | Relative energy (eV/atom) |
|---------------|-----------------------|-------------|-----------------------------|---------------------------|
| 50%           | AM                    | $P6_3mc$    | 1.49                        | 1.602                     |
| 25%           | FM                    | $Pmn2_1$    | 1.57                        | 0.975                     |
| 12.5%         | AM                    | $P6_3mc$    | 2.63                        | 0.355                     |
| 6.25%         | AFM                   | $P3m1$      | 2.36                        | 0.058                     |
| 5.56%         | AM                    | $P6_3mc$    | 2.71                        | 0                         |

To investigate the concentration-dependent electronic and magnetic properties of V-intercalated graphite, we strategically selected several discrete concentrations (50%, 25%, 12.5%, 6.25%, and 5.56%) based on structural symmetry and model feasibility (Fig. S2). The 12.5% concentration corresponds to the primary system investigated in the main article. For concentrations of 50%, 6.25%, and 5.56%, the vanadium atoms are positioned at sites analogous to the HH configuration, which preserves the intrinsic hexagonal symmetry of the pristine graphite lattice. In contrast, the 25% concentration adopts a configuration similar to the NH configuration. While the 50%, 25%, and 5.56% configurations theoretically possess the structural symmetry compatible with AM, the 6.25% concentration fails to maintain the necessary symmetry to support an AM phase, resulting in its convergence to an AFM ground state. Among the viable candidates, the 25% concentration ultimately favors a FM ground state. Furthermore, the remaining 50% and 5.56% configurations represent two extremes of the trade-off between magnetic splitting and energetic stability. Specifically, while the 50% concentration exhibits a substantial conduction band splitting of up to 477 meV due to the high density and proximity of V atoms (Fig. S3), its excessively high relative energy renders it thermodynamically unfavorable. Conversely, while the 5.56% concentration achieves the lowest relative energy, the increased interatomic distance significantly weakens the magnetic exchange interaction, leading to a diminished maximum splitting of 122 meV. Consequently, the 12.5% concentration strikes an optimal balance. It maintains robust magnetic exchange and a significant spin splitting while ensuring structural symmetry and energetic viability, thus emerging as the ideal candidate for realizing the AM phase.

Table S3

Symmetry analysis and magnetic properties of the altermagnetic ground state of the HH configuration ( $P6_3mc$ , No. 186). The table lists the Wyckoff position, site symmetry, and local magnetic moment ( $\mu_B$ ) for each atomic site.

| Atom                 | Site symmetry | Fractional Coordinates (x, y, z) | Magnetic moment ( $\mu_B$ ) |
|----------------------|---------------|----------------------------------|-----------------------------|
| C <sub>1</sub> (2a)  | 3m.           | (0.000, 0.000, 0.262)            | -0.095                      |
| C <sub>2</sub> (2a)  | 3m.           | (0.000, 0.000, 0.762)            | 0.095                       |
| C <sub>3</sub> (6c)  | .m.           | (0.330, 0.165, 0.253)            | 0.066                       |
| C <sub>4</sub> (6c)  | .m.           | (0.165, 0.330, 0.753)            | -0.066                      |
| C <sub>5</sub> (6c)  | .m.           | (0.500, -0.001, 0.246)           | 0.022                       |
| C <sub>6</sub> (6c)  | .m.           | (0.500, 0.001, 0.746)            | -0.022                      |
| C <sub>7</sub> (6c)  | .m.           | (0.835, 0.165, 0.253)            | 0.066                       |
| C <sub>8</sub> (2b)  | 3m.           | (0.667, 0.333, 0.761)            | 0.093                       |
| C <sub>9</sub> (6c)  | .m.           | (0.001, 0.500, 0.246)            | 0.022                       |
| C <sub>10</sub> (6c) | .m.           | (-0.001, 0.500, 0.746)           | -0.022                      |
| C <sub>11</sub> (2b) | 3m.           | (0.333, 0.667, 0.261)            | -0.093                      |
| C <sub>12</sub> (6c) | .m.           | (0.165, 0.835, 0.753)            | -0.066                      |
| C <sub>13</sub> (6c) | .m.           | (0.500, 0.500, 0.250)            | 0.022                       |
| C <sub>14</sub> (6c) | .m.           | (0.500, 0.500, 0.750)            | -0.022                      |
| C <sub>15</sub> (6c) | .m.           | (0.835, 0.670, 0.253)            | 0.066                       |
| C <sub>16</sub> (6c) | .m.           | (0.670, 0.835, 0.753)            | -0.066                      |
| V <sub>1</sub> (2b)  | 3m.           | (0.333, 0.667, -0.021)           | 2.638                       |
| V <sub>2</sub> (2b)  | 3m.           | (0.667, 0.333, 0.479)            | -2.638                      |

Table S4

Symmetry analysis and magnetic properties of the altermagnetic ground state of the NH configuration (*Aem2*, No. 39). The table lists the Wyckoff position, site symmetry, and local magnetic moment ( $\mu_B$ ) for each atomic site.

| Atom                 | Site symmetry | Fractional Coordinates ( $x, y, z$ ) | Magnetic moment ( $\mu_B$ ) |
|----------------------|---------------|--------------------------------------|-----------------------------|
| C <sub>1</sub> (4c)  | .m.           | (0.250, 0.250, 0.493)                | -0.010                      |
| C <sub>2</sub> (4c)  | .m.           | (0.250, 0.250, 0.005)                | 0.115                       |
| C <sub>3</sub> (8d)  | 1             | (0.000, 0.668, 0.500)                | 0.000                       |
| C <sub>4</sub> (8d)  | 1             | (0.250, 0.084, 0.998)                | -0.087                      |
| C <sub>5</sub> (4c)  | .m.           | (0.250, 0.750, 0.507)                | 0.010                       |
| C <sub>6</sub> (4c)  | .m.           | (0.250, 0.750, 0.995)                | -0.115                      |
| C <sub>7</sub> (8d)  | 1             | (0.500, 0.668, 0.500)                | 0.000                       |
| C <sub>8</sub> (8d)  | 1             | (0.250, 0.584, 0.002)                | 0.087                       |
| C <sub>9</sub> (8d)  | 1             | (0.500, 0.501, 0.500)                | 0.000                       |
| C <sub>10</sub> (8d) | 1             | (0.500, 0.501, 0.000)                | 0.000                       |
| C <sub>11</sub> (8d) | 1             | (0.250, 0.916, 0.488)                | -0.098                      |
| C <sub>12</sub> (8d) | 1             | (0.000, 0.833, 0.000)                | 0.000                       |
| C <sub>13</sub> (4a) | ..2           | (0.000, 0.500, 0.500)                | 0.000                       |
| C <sub>14</sub> (4a) | ..2           | (0.000, 0.500, 0.000)                | 0.000                       |
| C <sub>15</sub> (8d) | 1             | (0.250, 0.416, 0.512)                | 0.098                       |
| C <sub>16</sub> (8d) | 1             | (0.500, 0.833, 0.000)                | 0.000                       |
| C <sub>17</sub> (4c) | .m.           | (0.750, 0.750, 0.493)                | -0.010                      |
| C <sub>18</sub> (4c) | .m.           | (0.750, 0.750, 0.005)                | 0.115                       |
| C <sub>19</sub> (8d) | 1             | (0.500, 0.168, 0.500)                | 0.000                       |
| C <sub>20</sub> (8d) | 1             | (0.750, 0.584, 0.998)                | -0.087                      |
| C <sub>21</sub> (4c) | .m.           | (0.750, 0.250, 0.507)                | 0.010                       |
| C <sub>22</sub> (4c) | .m.           | (0.750, 0.250, 0.995)                | -0.115                      |
| C <sub>23</sub> (8d) | 1             | (0.000, 0.168, 0.500)                | 0.000                       |
| C <sub>24</sub> (8d) | 1             | (0.750, 0.084, 0.002)                | 0.087                       |
| C <sub>25</sub> (4a) | ..2           | (0.000, 0.001, 0.500)                | 0.000                       |
| C <sub>26</sub> (4a) | ..2           | (0.000, 0.001, 0.000)                | 0.000                       |
| C <sub>27</sub> (8d) | 1             | (0.750, 0.416, 0.488)                | -0.098                      |
| C <sub>28</sub> (8d) | 1             | (0.500, 0.333, 0.000)                | 0.000                       |
| C <sub>29</sub> (4b) | ..2           | (0.500, 0.001, 0.500)                | 0.000                       |
| C <sub>30</sub> (4b) | ..2           | (0.500, 0.001, 0.000)                | 0.000                       |
| C <sub>31</sub> (8d) | 1             | (0.750, 0.916, 0.512)                | 0.098                       |
| C <sub>32</sub> (8d) | 1             | (0.000, 0.333, 0.000)                | 0.000                       |
| V <sub>1</sub> (8d)  | 1             | (0.250, 0.914, 0.767)                | 2.505                       |
| V <sub>2</sub> (8d)  | 1             | (0.250, 0.414, 0.233)                | -2.505                      |
| V <sub>3</sub> (8d)  | 1             | (0.750, 0.414, 0.767)                | 2.505                       |
| V <sub>4</sub> (8d)  | 1             | (0.750, 0.914, 0.233)                | -2.505                      |

Table S5

Symmetry operations of the space group  $P6_3mc^{1,2}$ , listed using Seitz symbols. Among them, 1 and -1 denotes identity and inversion, respectively. The operation  $6_{001}$  denotes a sixfold rotation around the [001] axis, with  $6^+$  signifying a clockwise rotation and  $6^-$  denoting counterclockwise rotation.  $m_{100}$  represents a mirror reflection with

the (100) plane as the mirror plane. Vectors such as  $\begin{bmatrix} 00 \\ 2 \end{bmatrix}^1$  denote glide translation ( $t$ ).

Other operations follow similar conventions.

|                                                |                                                    |                                              |                                                     |
|------------------------------------------------|----------------------------------------------------|----------------------------------------------|-----------------------------------------------------|
| $\{1 \mid 0\}$                                 | $: (a, b, c) \rightarrow (a, b, c)$                | $\{m_{110} \mid 0\}$                         | $: (a, b, c) \rightarrow (-b, -a, c)$               |
| $\{3_{001}^+ \mid 0\}$                         | $: (a, b, c) \rightarrow (-b, a-b, c)$             | $\{m_{100} \mid 0\}$                         | $: (a, b, c) \rightarrow (-a+b, b, c)$              |
| $\{3_{001}^- \mid 0\}$                         | $: (a, b, c) \rightarrow (-a+b, -a, c)$            | $\{m_{010} \mid 0\}$                         | $: (a, b, c) \rightarrow (a, a-b, c)$               |
| $\left\{2_{001} \mid 00 \frac{1}{2}\right\}$   | $: (a, b, c) \rightarrow (-a, -b, c+\frac{1}{2})$  | $\left\{m_{110} \mid 00 \frac{1}{2}\right\}$ | $: (a, b, c) \rightarrow (b, a, c+\frac{1}{2})$     |
| $\left\{6_{001}^+ \mid 00 \frac{1}{2}\right\}$ | $: (a, b, c) \rightarrow (a-b, a, c+\frac{1}{2})$  | $\left\{m_{120} \mid 00 \frac{1}{2}\right\}$ | $: (a, b, c) \rightarrow (a-b, -b, c+\frac{1}{2})$  |
| $\left\{6_{001}^- \mid 00 \frac{1}{2}\right\}$ | $: (a, b, c) \rightarrow (b, -a+b, c+\frac{1}{2})$ | $\left\{m_{210} \mid 00 \frac{1}{2}\right\}$ | $: (a, b, c) \rightarrow (-a, -a+b, c+\frac{1}{2})$ |

Table S6

Symmetry operations of the space group  $Aem2^{1,2}$ , listed using Seitz symbols.

|                                               |                                                             |                                               |                                                               |
|-----------------------------------------------|-------------------------------------------------------------|-----------------------------------------------|---------------------------------------------------------------|
| $\{1 \mid 0\}$                                | $: (a, b, c) \rightarrow (a, b, c)$                         | $\{2_{001} \mid 0\}$                          | $: (a, b, c) \rightarrow (-a, -b, c)$                         |
| $\left\{1 \mid 0 \frac{11}{22}\right\}$       | $: (a, b, c) \rightarrow (a, b+\frac{1}{2}, c+\frac{1}{2})$ | $\left\{2_{001} \mid 0 \frac{11}{22}\right\}$ | $: (a, b, c) \rightarrow (-a, -b+\frac{1}{2}, c+\frac{1}{2})$ |
| $\left\{m_{010} \mid 00 \frac{1}{2}\right\}$  | $: (a, b, c) \rightarrow (a, -b, c+\frac{1}{2})$            | $\left\{m_{100} \mid 00 \frac{1}{2}\right\}$  | $: (a, b, c) \rightarrow (-a, b, c+\frac{1}{2})$              |
| $\left\{m_{010} \mid 0 \frac{1}{2} 0\right\}$ | $: (a, b, c) \rightarrow (a, -b+\frac{1}{2}, c)$            | $\left\{m_{100} \mid 0 \frac{1}{2} 0\right\}$ | $: (a, b, c) \rightarrow (-a, b+\frac{1}{2}, c)$              |

Table S7

Sensitivity analysis of the magnetic and electronic properties of V-GICs with respect to  $U_{\text{eff}}$ . The table summarizes the calculated energy difference between the antiferromagnetic (altermagnetic for HH and NH) and ferromagnetic phases, the local magnetic moment of vanadium atoms, the maximum spin-splitting energy of the conduction bands and MAE for  $U_{\text{eff}}$  values ranging from 3.0 to 6.0 eV.  $\Delta E$  denotes the relative energy difference per atom among the three different intercalation sites at each  $U_{\text{eff}}$ .

| Intercalation site | $U_{\text{eff}}$ (eV)                  | 3    | 4    | 5    | 6    |
|--------------------|----------------------------------------|------|------|------|------|
| HH                 | $E_{\text{FM}} - E_{\text{AFM}}$ (meV) | 459  | 378  | 284  | 194  |
|                    | Magnetic Moment ( $\mu_{\text{B}}$ )   | 2.49 | 2.52 | 2.63 | 2.60 |
|                    | Max band splitting (meV)               | 235  | 306  | 272  | 239  |
|                    | MAE (meV)                              | 0.4  | 0.5  | 0.6  | 0.7  |
|                    | $\Delta E$ (meV/atom)                  | 3.1  | 0    | 3.3  | 15.3 |
| NH                 | $E_{\text{FM}} - E_{\text{AFM}}$ (meV) | 394  | 429  | 421  | 402  |
|                    | Magnetic Moment ( $\mu_{\text{B}}$ )   | 2.28 | 2.41 | 2.50 | 2.57 |
|                    | Max band splitting (meV)               | 122  | 159  | 201  | 236  |
|                    | MAE (meV)                              | 0.4  | 0.5  | 0.6  | 0.7  |
|                    | $\Delta E$ (meV/atom)                  | 0    | 0.4  | 3.9  | 18.6 |
| TS                 | $E_{\text{FM}} - E_{\text{AFM}}$ (meV) | 118  | 139  | 143  | 292  |
|                    | Magnetic Moment ( $\mu_{\text{B}}$ )   | 2.54 | 2.58 | 2.61 | 2.64 |
|                    | $\Delta E$ (meV/atom)                  | 29.7 | 12.5 | 0    | 0    |

To confirm the reliability of our conclusions, we performed a sensitivity analysis by varying the  $U_{\text{eff}}$  parameter from 3.0 to 6.0 eV. The results demonstrate that the qualitative physical picture of V-GICs remains remarkably robust across this range. Specifically, for all considered  $U_{\text{eff}}$  values, the  $E_{\text{FM}} - E_{\text{AFM}}$  values stay positive, indicating that the altermagnetic or antiferromagnetic ground states are energetically more favorable than the ferromagnetic phase in  $\text{C}_{16}\text{V}_2$ . However, the relative energy difference  $\Delta E$  among the three intercalation sites exhibits strong  $U_{\text{eff}}$  dependence.

Therefore, we further verified their structural stability using phonon dispersion and AIMD calculations (Fig. 2). The TS configuration is ruled out due to the presence of large imaginary frequencies in its phonon spectra. For the remaining stable HH and NH configurations, the considerable spin-splitting is consistently preserved across all  $U_{\text{eff}}$  values (Fig. S6). Furthermore, the MAE shows no sign of easy-axis switching. The HH configuration maintains a stable in-plane anisotropy, while the NH configuration exhibits persistent out-of-plane anisotropy. Although the magnitudes of magnetic moments, spin-splitting, and MAE values change slightly with  $U_{\text{eff}}$  due to the enhanced electron localization, the overall physical trends and the symmetry-dictated properties remain unchanged, justifying the choice of  $U_{\text{eff}}$  in our main study.

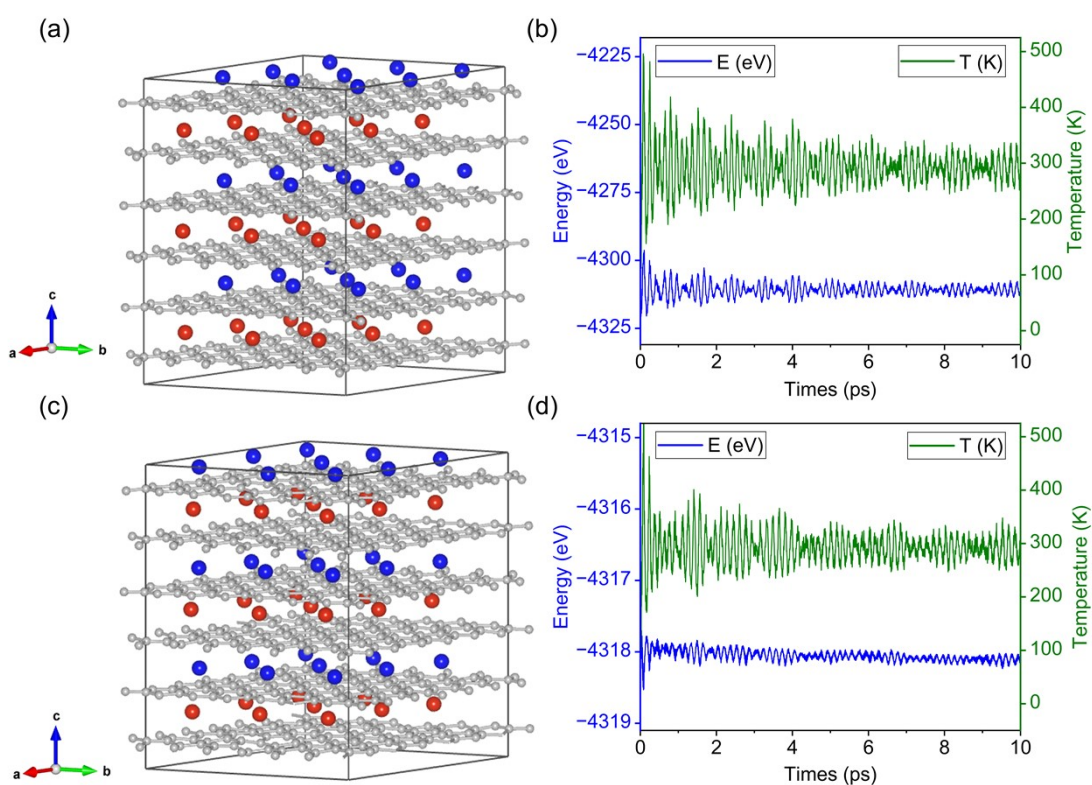

Fig. S1. Thermal stability of V-intercalated graphite at 300 K. (a, c) Perspective views of the 3×3×3 supercells containing 486 atoms for the (a) HH and (c) NH intercalation configurations after 10 ps of AIMD simulations at 300 K. Both configurations demonstrate structural integrity and relaxation to thermodynamic equilibrium. (b, d) Time evolution profiles of temperature fluctuations (green curves) and total energy convergence (blue curves) during the AIMD simulations for the (b) HH and (d) NH configurations, respectively.

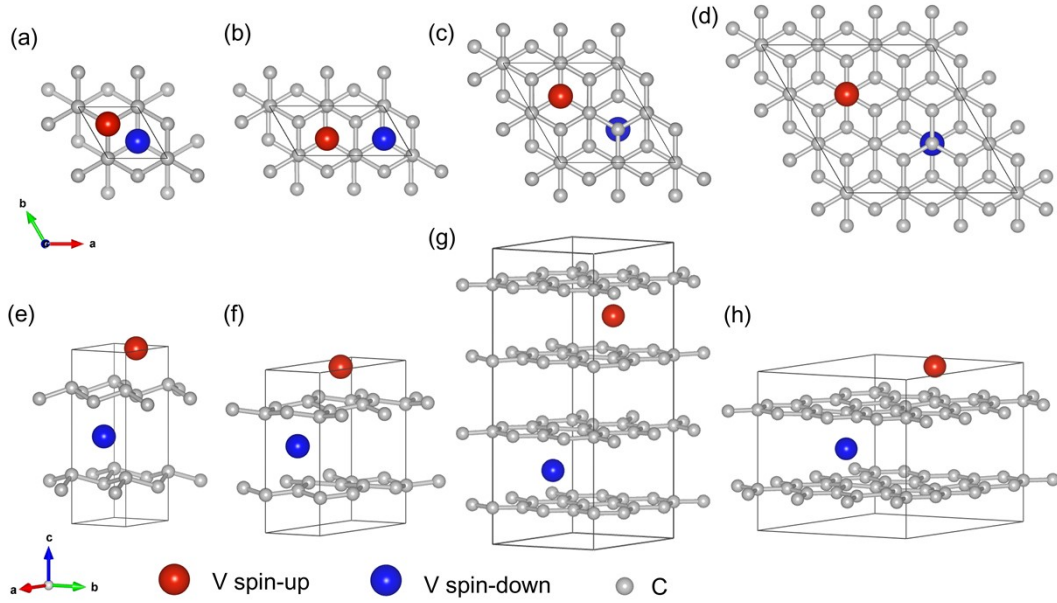

Fig. S2. Schematic crystal structures of V-GICs at various intercalation concentrations. (a)–(d) Top views along the  $c$ -axis and (e)–(h) corresponding perspective views for: (a, e) 50% concentration, a high-density stage-1 structure where V atoms occupy all available hexagonal centers in a  $1\times 1\times 1$  manner. (b, f) 25% concentration, a NH-like clustered distribution, showing decreased V–V proximity within a  $2\times 1\times 1$  supercell. (c, g) 6.25% concentration, a stage-2 structure featuring a HH-like uniform distribution in the  $ab$ -plane projection. (d, h) 5.56% concentration, a low-density  $3\times 3\times 1$  stage-1 structure representing the most uniform distribution, where the increased V–V distance leads to weakened exchange interactions.

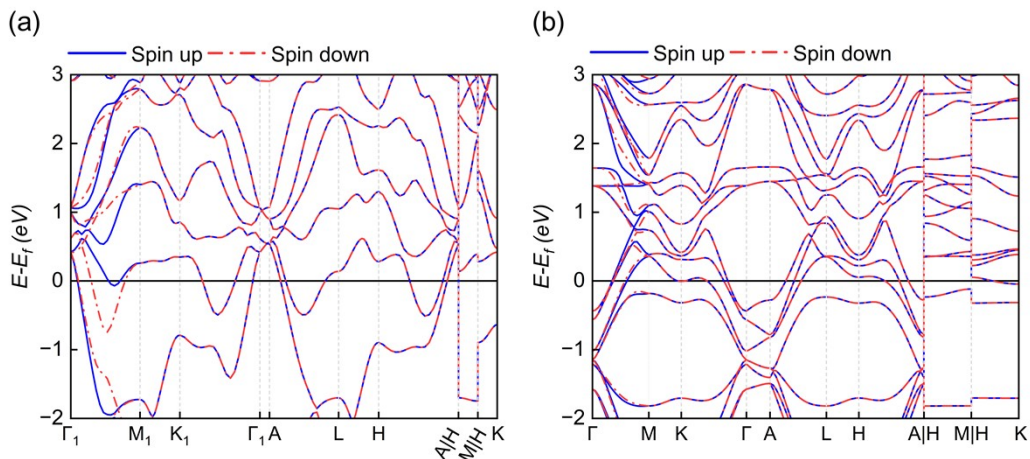

Fig. S3. Electronic band structures with different intercalation concentrations along the same high-symmetry path as the 12.5% HH phase for (a) 50% and (b) 5.56%.

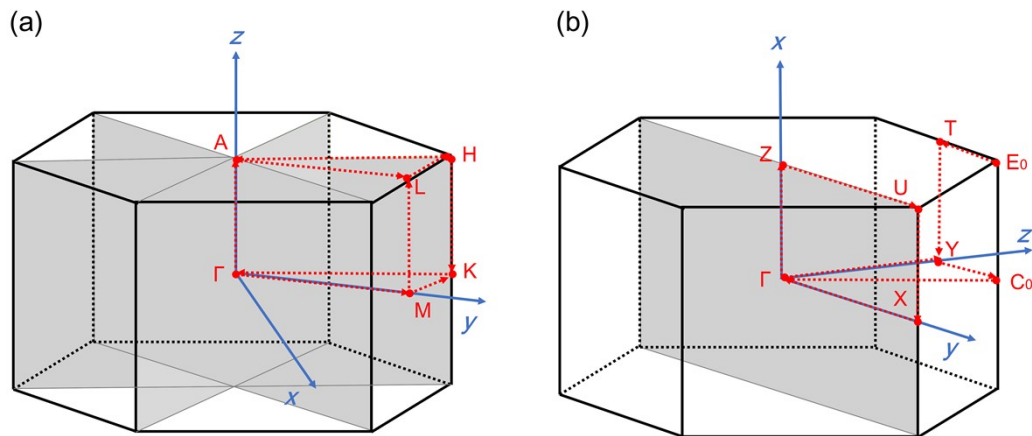

Fig. S4. The first Brillouin zone along with the high-symmetry  $k$ -path used in the band structure calculations of V-GICs for the (a) HH and (b) NH configurations, respectively.

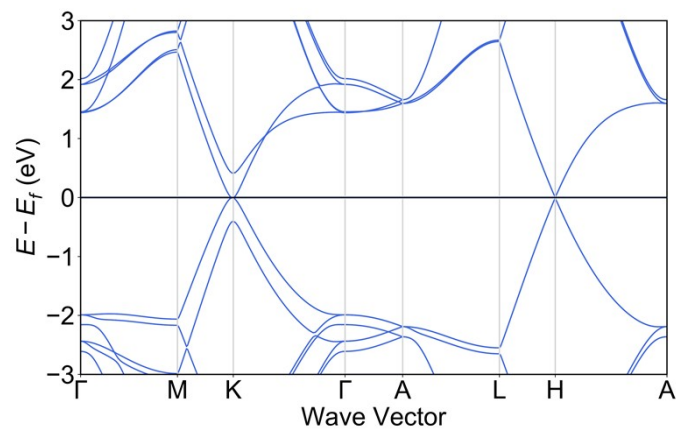

Fig. S5. Band structure of the pristine graphite, shown for reference. Our result excellently agrees with previous work<sup>3</sup>.

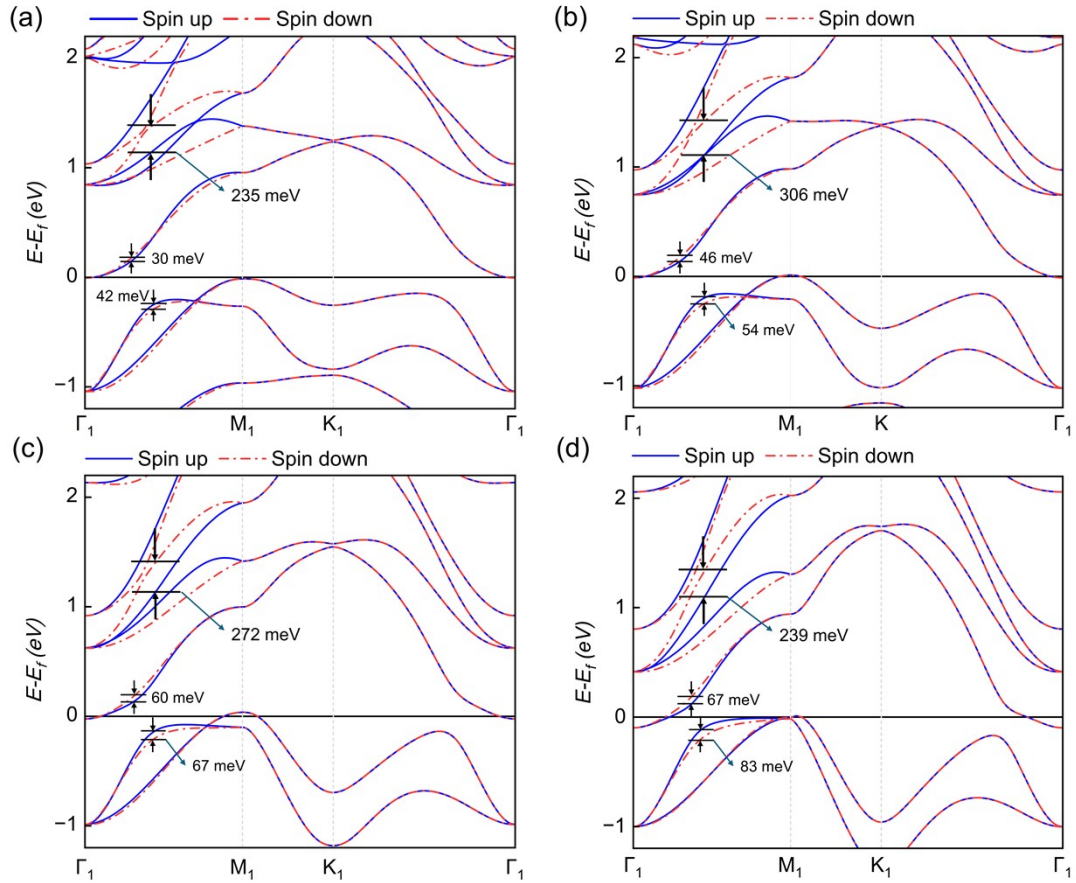

Fig. S6. Calculated band structures of the HH configuration under different  $U_{\text{eff}}$  corrections along the specific high-symmetry path  $\Gamma_1 - M_1 - K_1 - \Gamma_1$ : (a)  $U_{\text{eff}} = 3.0$  eV, (b) 4.0 eV, (c) 5.0 eV, and (d) 6.0 eV. The red and blue lines represent spin-up and spin-down channels, respectively. Selected spin-splitting values near the conduction band minimum are explicitly marked. The comparison reveals that while the exact magnitude of the splitting varies slightly, the characteristic momentum-dependent splitting pattern and the metallic nature remain qualitatively consistent across the tested range.

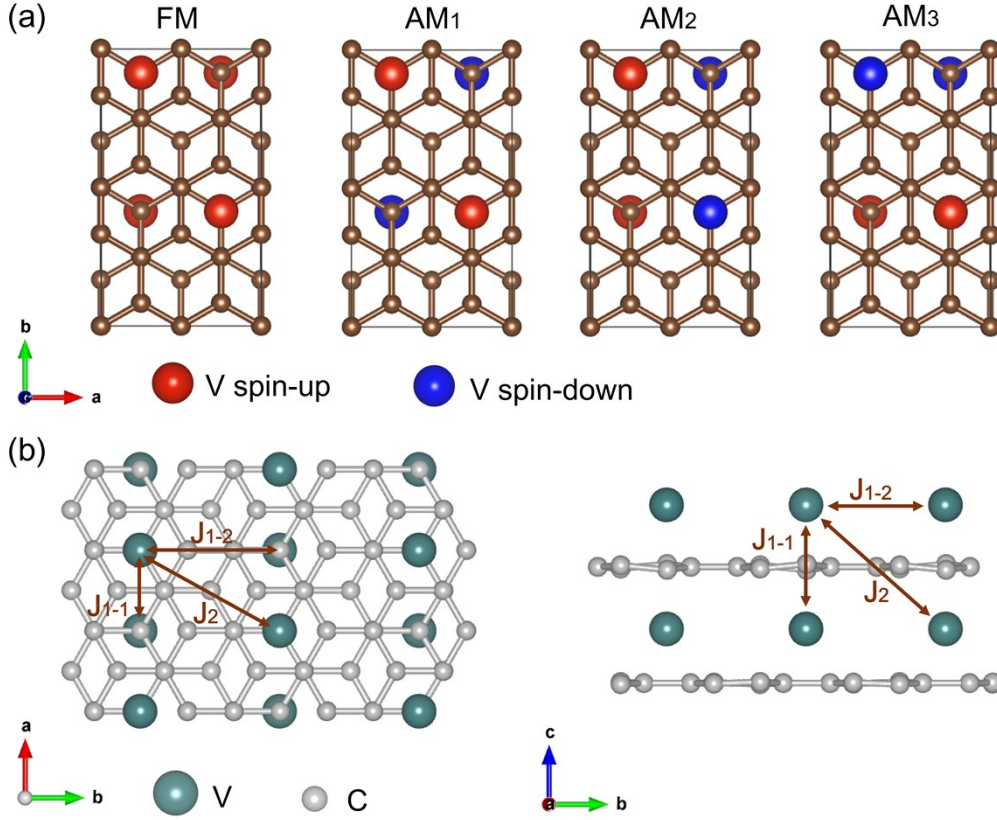

Fig. S7. (a) Supercells utilized for calculating exchange coupling constants in the NH structure. Brown spheres represent carbon atoms, and the red and blue spheres represent vanadium atoms with spin up and spin down. Energy differences among the four supercells were determined using DFT+ $U$  ( $U_{\text{eff}} = 5$  eV). (b) Schematic representation of the magnetic exchange pairs in the NH structure.

To investigate the magnetic ground state and the corresponding exchange interactions of the NH phase, we calculated the total energies of four distinct magnetic configurations: FM, and three antiferromagnetic states (AM<sub>1</sub>, AM<sub>2</sub>, and AM<sub>3</sub>). The corresponding supercell models and their spin-coupling schemes are illustrated in Fig. S6(a) and (b), respectively. By mapping these configurations onto the Heisenberg Hamiltonian, the energy of each state is expressed as:

$$\begin{aligned}
 E_{FM} &= -E_0 - (4J_{1-1} + 4J_{1-2} + 6J_2)|\vec{S}|^2 - D|\vec{S}_z|^2 \\
 E_{AM1} &= -E_0 - (-4J_{1-1} - 4J_{1-2} + 6J_2)|\vec{S}|^2 - D|\vec{S}_z|^2 \\
 E_{AM2} &= -E_0 - (-4J_{1-1} + 4J_{1-2} - 2J_2)|\vec{S}|^2 - D|\vec{S}_z|^2 \\
 E_{AM3} &= -E_0 - (4J_{1-1} - 4J_{1-2} - 2J_2)|\vec{S}|^2 - D|\vec{S}_z|^2
 \end{aligned}$$

Our DFT results identify the AM<sub>1</sub> configuration as the magnetic ground state. Relative to the AM<sub>1</sub> state, the calculated energies for FM, AM<sub>2</sub>, and AM<sub>3</sub> states are 0.62 eV, 0.92 eV and 0.50 eV, respectively. These energy differences allow for self-consistent determination of the exchange coupling constants  $J_{1-1}$ ,  $J_{1-2}$ , and  $J_2$  for the NH phase.

## References

- 1 M. I. Aroyo, J. M. Perez-Mato, D. Orobengoa and E. Tasci.
- 2 X. Chen, J. Ren, Y. Zhu, Y. Yu, A. Zhang, P. Liu, J. Li, Y. Liu, C. Li and Q. Liu, *Phys. Rev. X*, 2024, **14**, 31038.
- 3 J.-C. Charlier, X. Gonze and J.-P. Michenaud, *Phys. Rev. B*, 1991, **43**, 4579–4589.
